# Supplementary material for: Validation of the Italian Version of the Dizziness Handicap Inventory, the Situational Vertigo Questionnaire, and the Activity-Specific Balance Confidence Scale for Peripheral and Central Vestibular Symptoms
Source: PubMed Central journal article supplement (PMC5641311; doi:10.3389/fneur.2017.00528), 2017-10-10
Supplement: data_sheet_1.pdf [file data_sheet_1.pdf]

**RISPONDA ALLE DOMANDE IN BASE A COME È STATA LA SUA VERTIGINE NEGLI ULTIMI TEMPI (NON IN BASE A COME SI SENTE IN QUESTO PRECISO MOMENTO)**

|      |                                                                                                                                                         |    |    |               |
|------|---------------------------------------------------------------------------------------------------------------------------------------------------------|----|----|---------------|
| P1.  | I suoi disturbi peggiorano se guarda verso l'alto?                                                                                                      | Si | No | Qualche volta |
| E2.  | A causa dei suoi disturbi si sente frustrato?                                                                                                           | Si | No | Qualche volta |
| F3.  | A causa dei suoi disturbi limita le occasioni di viaggio per lavoro o per svago?                                                                        | Si | No | Qualche volta |
| P4.  | Camminare lungo il corridoio di un supermercato peggiora i suoi disturbi?                                                                               | Si | No | Qualche volta |
| F5.  | A causa dei suoi disturbi ha difficoltà a sdraiarsi nel letto o ad alzarsi dal letto?                                                                   | Si | No | Qualche volta |
| F6.  | I suoi disturbi riducono significativamente la sua partecipazione in occasioni sociali come uscire a cena, andare al cinema, a ballare o a delle feste? | Si | No | Qualche volta |
| F7.  | A causa dei suoi disturbi ha difficoltà a leggere?                                                                                                      | Si | No | Qualche volta |
| P8.  | Praticare attività impegnative come uno sport, ballare, fare le pulizie o sparecchiare peggiora i suoi disturbi?                                        | Si | No | Qualche volta |
| E9.  | A causa dei suoi disturbi ha paura ad uscire di casa senza che qualcuno la accompagni?                                                                  | Si | No | Qualche volta |
| E10. | A causa dei suoi disturbi si sente in imbarazzo di fronte ad estranei?                                                                                  | Si | No | Qualche volta |
| P11. | I movimenti rapidi della testa peggiorano i suoi disturbi?                                                                                              | Si | No | Qualche volta |
| F12. | A causa dei suoi disturbi evita i luoghi elevati?                                                                                                       | Si | No | Qualche volta |
| P13. | Girarsi nel letto peggiora i suoi disturbi?                                                                                                             | Si | No | Qualche volta |
| F14. | A causa dei suoi disturbi ha difficoltà a svolgere i lavori di casa più pesanti o i lavori in giardino?                                                 | Si | No | Qualche volta |
| E15. | A causa dei suoi disturbi teme che la gente possa pensare che sia drogato o ubriaco?                                                                    | Si | No | Qualche volta |
| F16. | A causa dei suoi disturbi è difficile per lei camminare da solo?                                                                                        | Si | No | Qualche volta |
| P17. | Camminare lungo un marciapiede peggiora i suoi disturbi?                                                                                                | Si | No | Qualche volta |
| E18. | A causa dei suoi disturbi fa fatica a concentrarsi?                                                                                                     | Si | No | Qualche volta |
| F19. | A causa dei suoi disturbi ha difficoltà a camminare in casa al buio?                                                                                    | Si | No | Qualche volta |
| E20. | A causa dei suoi disturbi ha paura di rimanere in casa da solo?                                                                                         | Si | No | Qualche volta |
| E21. | A causa dei suoi disturbi si sente inabilitato?                                                                                                         | Si | No | Qualche volta |
| E22. | I suoi disturbi hanno creato tensione nelle sue relazioni con i familiari o con gli amici?                                                              | Si | No | Qualche volta |
| E23. | A causa dei suoi disturbi si sente depresso?                                                                                                            | Si | No | Qualche volta |
| F24. | I suoi disturbi interferiscono con le sue responsabilità lavorative o domestiche?                                                                       | Si | No | Qualche volta |
| P25. | Piegarsi in avanti peggiora i suoi disturbi?                                                                                                            | Si | No | Qualche volta |

**Segni con una crocetta** quanto le condizioni descritte possono provocare o peggiorare la sua vertigine

**0** = Per niente

**1** = Molto poco

**2** = Un poco

**3** = Abbastanza

**4** = Molto

Se non si è mai trovato nella condizione descritta segni:

**Non l'ho mai fatto**

|                                                                                                                          |          |          |          |          |          |                           |
|--------------------------------------------------------------------------------------------------------------------------|----------|----------|----------|----------|----------|---------------------------|
| In macchina come passeggero percorrendo una strada dritta e piatta                                                       | <b>0</b> | <b>1</b> | <b>2</b> | <b>3</b> | <b>4</b> | <b>Non l'ho mai fatto</b> |
| In macchina come passeggero percorrendo una strada curva o sterrata                                                      | <b>0</b> | <b>1</b> | <b>2</b> | <b>3</b> | <b>4</b> | <b>Non l'ho mai fatto</b> |
| Camminando lungo la corsia di un supermercato                                                                            | <b>0</b> | <b>1</b> | <b>2</b> | <b>3</b> | <b>4</b> | <b>Non l'ho mai fatto</b> |
| In piedi in un ascensore quando l'ascensore si ferma                                                                     | <b>0</b> | <b>1</b> | <b>2</b> | <b>3</b> | <b>4</b> | <b>Non l'ho mai fatto</b> |
| In piedi in un ascensore mentre si muove ad una velocità costante                                                        | <b>0</b> | <b>1</b> | <b>2</b> | <b>3</b> | <b>4</b> | <b>Non l'ho mai fatto</b> |
| In automobile a velocità costante                                                                                        | <b>0</b> | <b>1</b> | <b>2</b> | <b>3</b> | <b>4</b> | <b>Non l'ho mai fatto</b> |
| In automobile alla partenza o frenando                                                                                   | <b>0</b> | <b>1</b> | <b>2</b> | <b>3</b> | <b>4</b> | <b>Non l'ho mai fatto</b> |
| Stando in piedi nel mezzo di un grande spazio aperto (ad esempio un parco o una piazza)                                  | <b>0</b> | <b>1</b> | <b>2</b> | <b>3</b> | <b>4</b> | <b>Non l'ho mai fatto</b> |
| Seduto su un autobus                                                                                                     | <b>0</b> | <b>1</b> | <b>2</b> | <b>3</b> | <b>4</b> | <b>Non l'ho mai fatto</b> |
| In piedi su un autobus                                                                                                   | <b>0</b> | <b>1</b> | <b>2</b> | <b>3</b> | <b>4</b> | <b>Non l'ho mai fatto</b> |
| In un luogo elevato                                                                                                      | <b>0</b> | <b>1</b> | <b>2</b> | <b>3</b> | <b>4</b> | <b>Non l'ho mai fatto</b> |
| Guardando in televisione o al cinema delle scene in movimento                                                            | <b>0</b> | <b>1</b> | <b>2</b> | <b>3</b> | <b>4</b> | <b>Non l'ho mai fatto</b> |
| Utilizzando le scale mobili                                                                                              | <b>0</b> | <b>1</b> | <b>2</b> | <b>3</b> | <b>4</b> | <b>Non l'ho mai fatto</b> |
| Guardando superfici rigate o in movimento (ad esempio delle tende colorate, le veneziane, l'acqua che scorre)            | <b>0</b> | <b>1</b> | <b>2</b> | <b>3</b> | <b>4</b> | <b>Non l'ho mai fatto</b> |
| Guardando scorrere lo schermo del computer                                                                               | <b>0</b> | <b>1</b> | <b>2</b> | <b>3</b> | <b>4</b> | <b>Non l'ho mai fatto</b> |
| Attraversando una galleria e guardando le luci su un lato                                                                | <b>0</b> | <b>1</b> | <b>2</b> | <b>3</b> | <b>4</b> | <b>Non l'ho mai fatto</b> |
| Attraversando una galleria e guardando le luci alla fine della galleria stessa                                           | <b>0</b> | <b>1</b> | <b>2</b> | <b>3</b> | <b>4</b> | <b>Non l'ho mai fatto</b> |
| Guidando un'automobile sulla salita di una collina, lungo una curva o in spazi ampi                                      | <b>0</b> | <b>1</b> | <b>2</b> | <b>3</b> | <b>4</b> | <b>Non l'ho mai fatto</b> |
| Guardando il flusso del traffico o un treno in movimento (ad esempio cercando di attraversare la strada o alla stazione) | <b>0</b> | <b>1</b> | <b>2</b> | <b>3</b> | <b>4</b> | <b>Non l'ho mai fatto</b> |

Risponda alle domande con un numero da 0 a 100 che significa:

**0 = minima sicurezza**

**100 = massima sicurezza**

**“quanto si sente sicuro di mantenere l’equilibrio se...**

|                                                                                                  |       |
|--------------------------------------------------------------------------------------------------|-------|
| ...cammina dentro casa?                                                                          | _____ |
| ...sale o scende le scale?                                                                       | _____ |
| ... si china per raccogliere una ciabatta dal ripiano più basso dell’armadio?                    | _____ |
| ... si allunga per prendere una lattina da un ripiano all’altezza dei suoi occhi?                | _____ |
| ... si alza sulle punte per raggiungere qualcosa sopra alla sua testa?                           | _____ |
| ... si allunga per prendere qualcosa mentre è seduto?                                            | _____ |
| ...pulisce il pavimento?                                                                         | _____ |
| ... cammina da casa fino alla macchina parcheggiata sul viale?                                   | _____ |
| ...sale o scende dalla macchina?                                                                 | _____ |
| ... cammina attraverso il parcheggio fino al supermercato?                                       | _____ |
| ...sale o scende una rampa?                                                                      | _____ |
| ... cammina in un supermercato pieno di gente che le passa accanto velocemente?                  | _____ |
| ... viene spinto dalle persone mentre attraversa il supermercato?                                | _____ |
| ... sale o scende da una scala mobile mentre si tiene al corrimano?                              | _____ |
| ... sale o scende da una scala mobile mentre regge dei pacchi, non potendo tenersi al corrimano? | _____ |
| ...cammina su un marciapiede ghiacciato?                                                         | _____ |
